# Supplementary material
Source: PubMed Central journal article supplement (PMC3508088)
Supplement: NIHMS398263-supplement-01.pdf [file NIHMS398263-supplement-01.pdf]

**SUPPLEMENTARY FIGURES****Supplementary Figure 1.**

The three vertical lines correspond to the rostro-caudal levels of the sections shown in panels A, B and C that contain the region of interest. Inset: A mid-sagittal photograph of the left hemisphere of a human brain showing the cingulate gyrus. Galloxyanine-stained coronal sections showing the localization of the investigated region, the dorsal anterior cingulate (dACC, within dashed box), at three rostrocaudal levels (ABC) in a control subject. Scale bars = 1 cm.

**Supplementary Figure 2.**

Photomontages of the dACC at rostral (A) and caudal level (B), corresponding to areas 24a'-c' as shown in Figures 2A and 2C respectively, illustrating the cytoarchitectonic features at each level from a control subject. Arrowheads indicate borders among areas 33, 24a', 24b', 24c', and 32', respectively, moving dorsally from the corpus callosum. Scale bar = 1 mm.

**Supplementary Figure 3.**

Photomicrographs depicting typical cellular features of the superficial and deep layers of area 24b' in a control subject (panels A: layer II, B: layer III, C: layer V and D: layer VI) and in a patient with schizophrenia (panels E: layer II, F: layer III, G: layer V and G: layer VI). Note the many satellite oligodendrocytes surrounding pyramidal cell perikarya. Scale bar = 25  $\mu$ m.

**Supplementary Figure 4.**

(A-D) Variations in volume in controls (open circles) and in patients with schizophrenia (filled circles), in superficial (II-III) and deep (V-VI) layers of the dACC volume (corresponding to area 24a'-c').

Cortical volume between groups (A, C), and across age (B, D).

(E-H) Variations in neurons in controls (open circles) and in patients with schizophrenia (filled circles), in superficial (II-III) and deep (V-VI) layers of the dACC volume (corresponding to area 24a'-c').

Estimated population of total neuron numbers between groups (E, G), and across age (F, H).

(I-L) Variations in glial cells (oligodendrocytes and astrocytes) in controls (open circles) and in patients with schizophrenia (filled circles), in superficial (II-III) and deep (V-VI) layers of the dACC volume (corresponding to area 24a'-c'). Estimated population of total glial numbers between groups (I, K), and across age (J, L).
