# Supplementary material
Source: PubMed Central journal article supplement (PMC3508088)

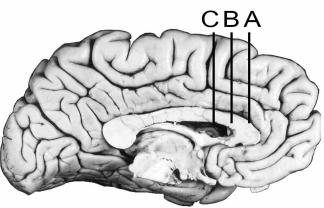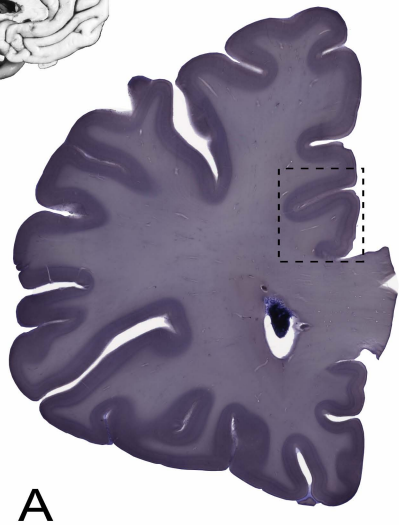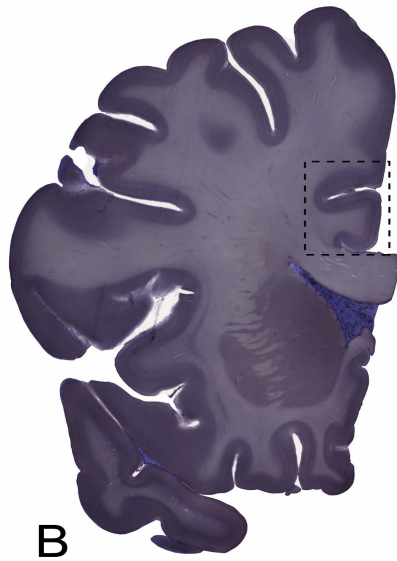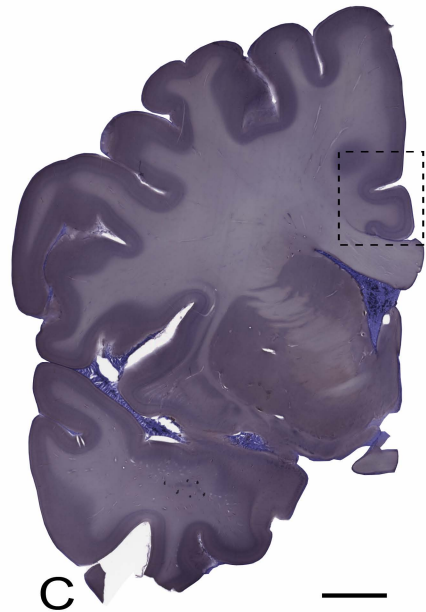

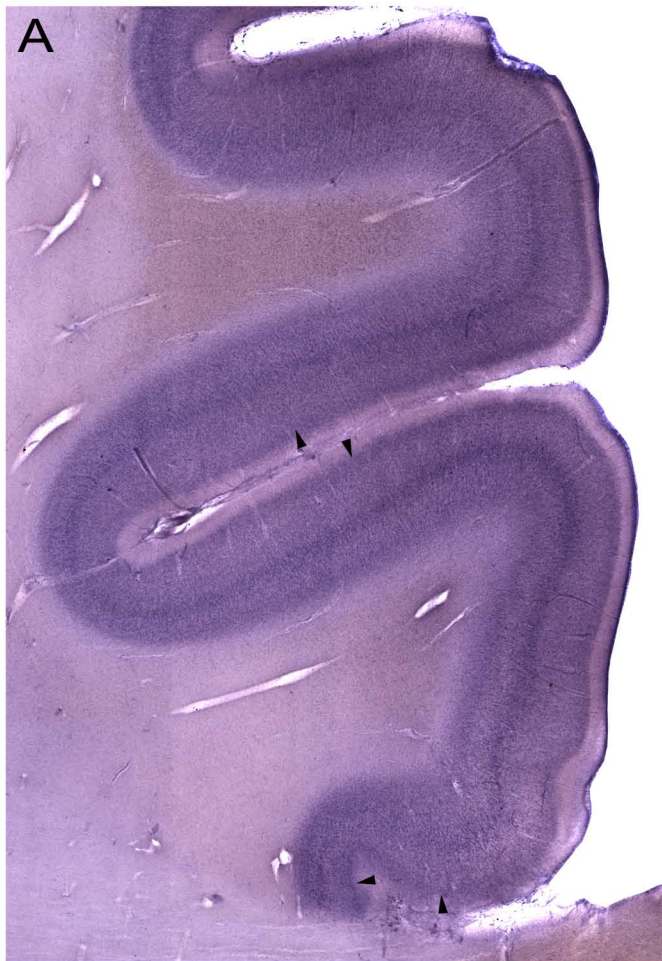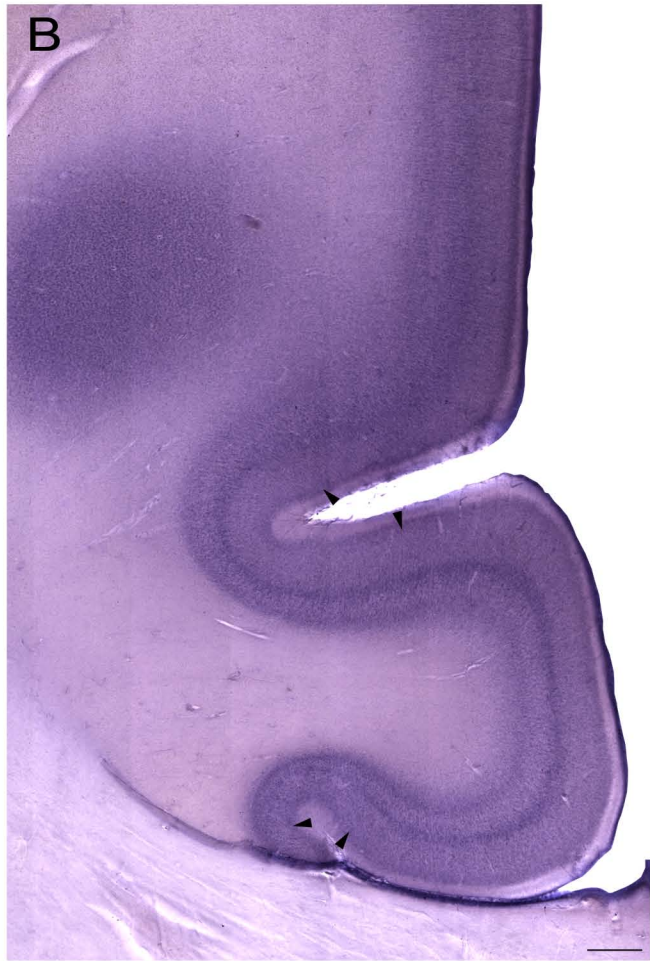

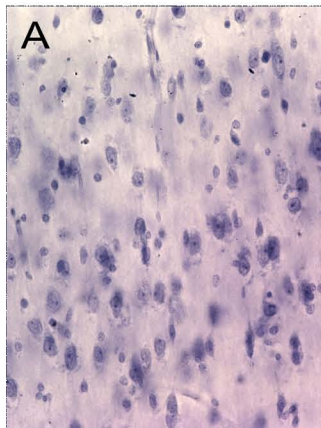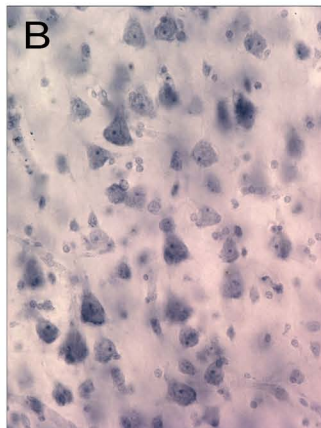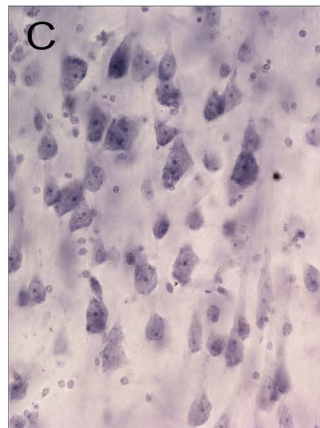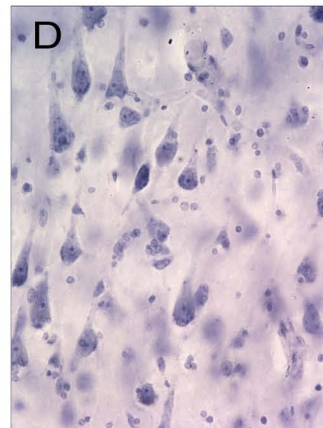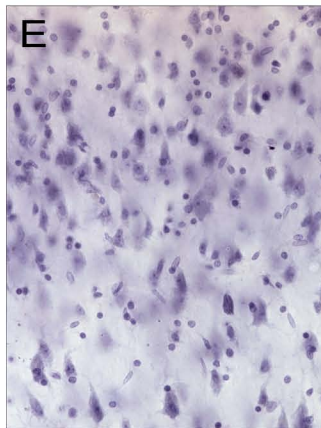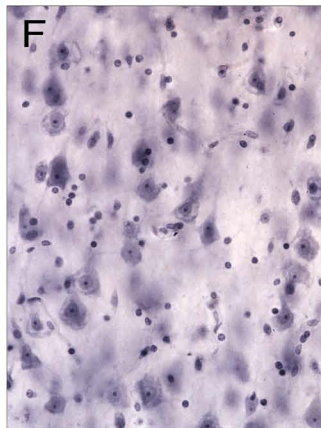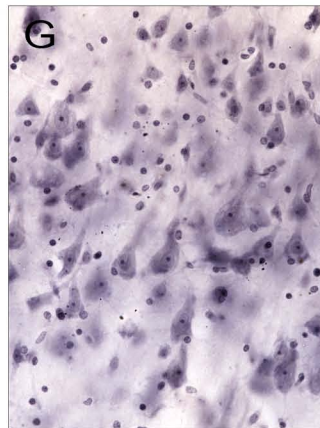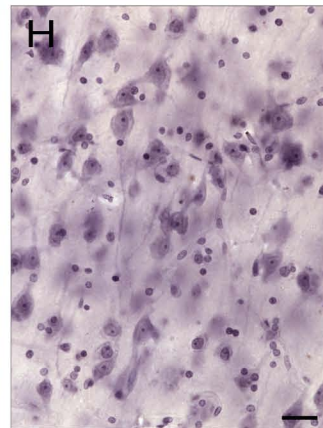

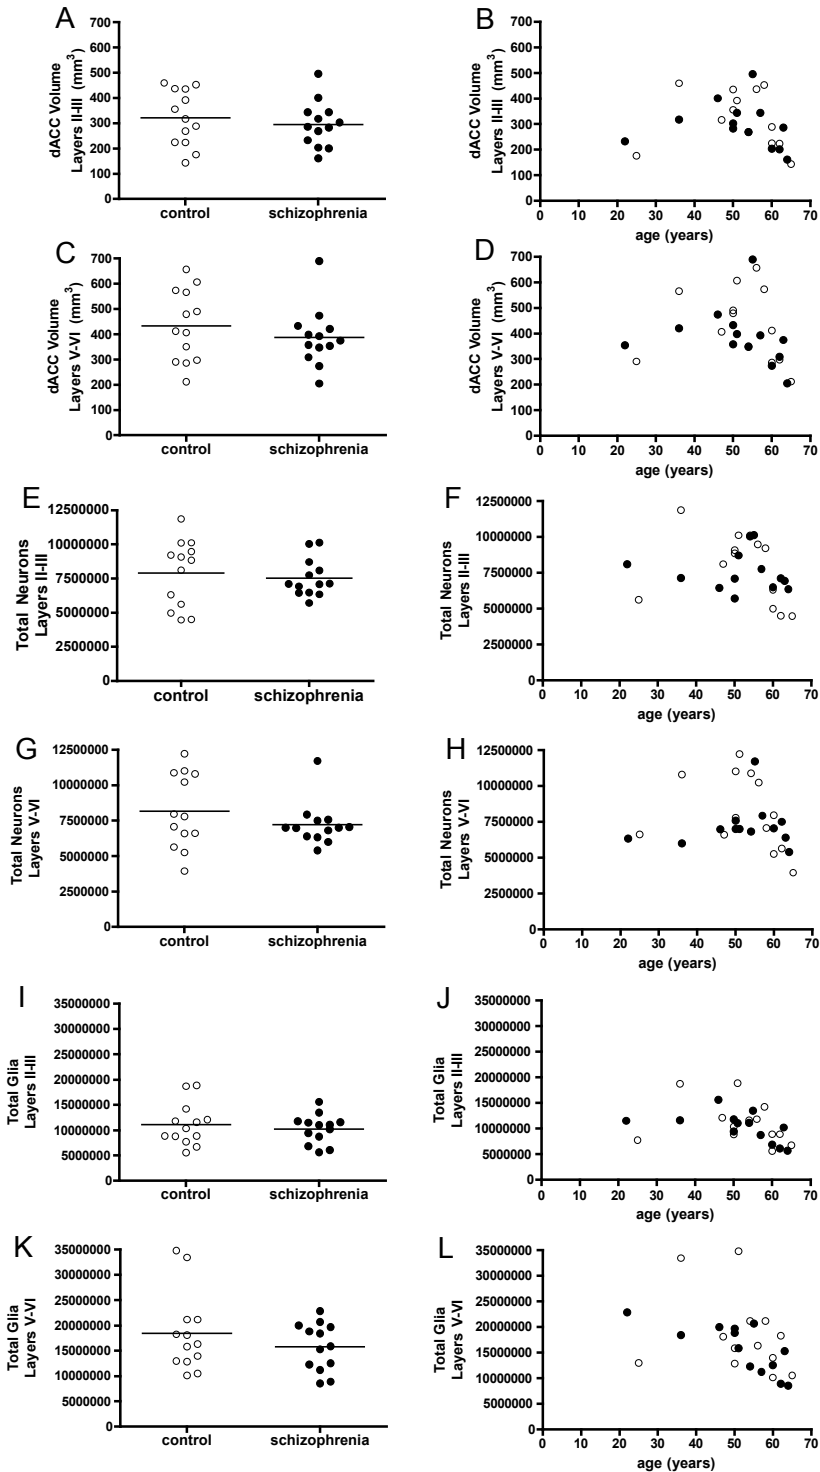

Supplement: NIHMS398263-supplement-Supp_Fig_S1-S4.pdf [file NIHMS398263-supplement-Supp_Fig_S1-S4.pdf]
